# Supplementary material
Source: PubMed Central journal article supplement (PMC5910672)
Supplement: mmc1.pdf [file mmc1.pdf]

YMTHE, Volume 26

## **Supplemental Information**

### **miR-145 Antagonizes SNAI1-Mediated Stemness and Radiation Resistance in Colorectal Cancer**

**Yun Zhu, Cindy Wang, Scott A. Becker, Katie Hurst, Lourdes M. Nogueira, Victoria J. Findlay, and E. Ramsay Camp**

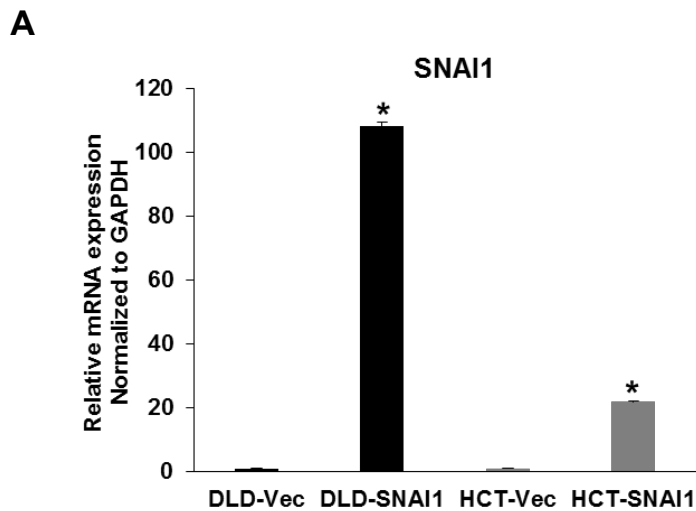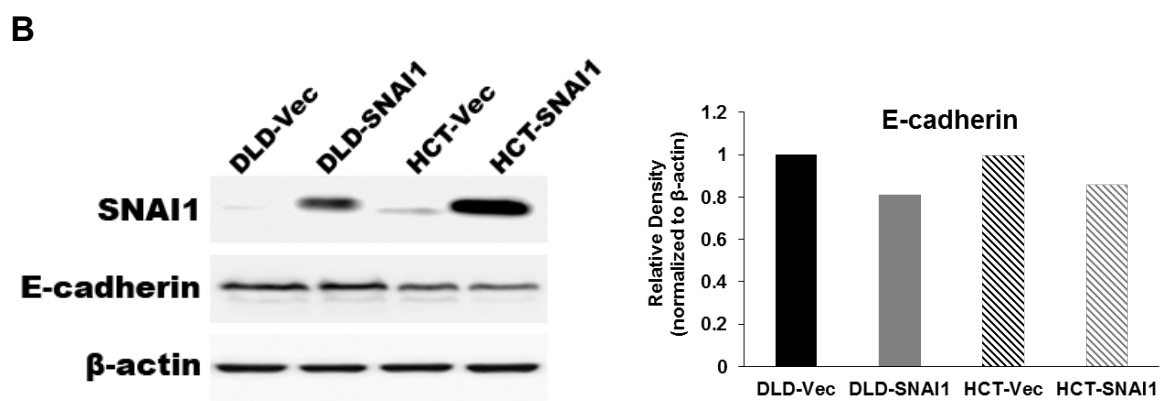

**Fig S1. SNAI1 expression in SNAI1 stable cell lines.** Expression of SNAI1 mRNA (A, \*  $p < 0.05$ ) and protein level as well as relative density quantitation of E-cadherin (B) in colorectal cancer cell lines with stable transfection of SNAI1 (DLD1-SNAI1; HCT116-SNAI1) and empty vector (Vec) plasmid.

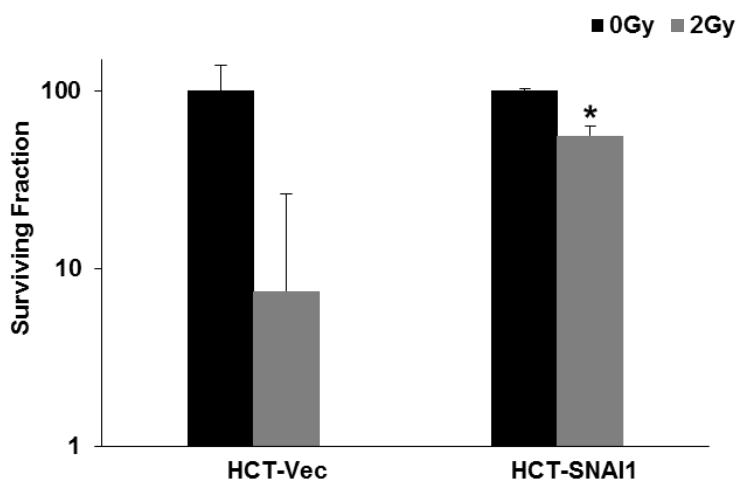

**Fig S2 Clonogenic assay on HCT116-SNAI1 cell.** Comparing to control cell with and without radiation treatment, SNAI1 expression enhanced cell viability (\*  $p < 0.05$ ).

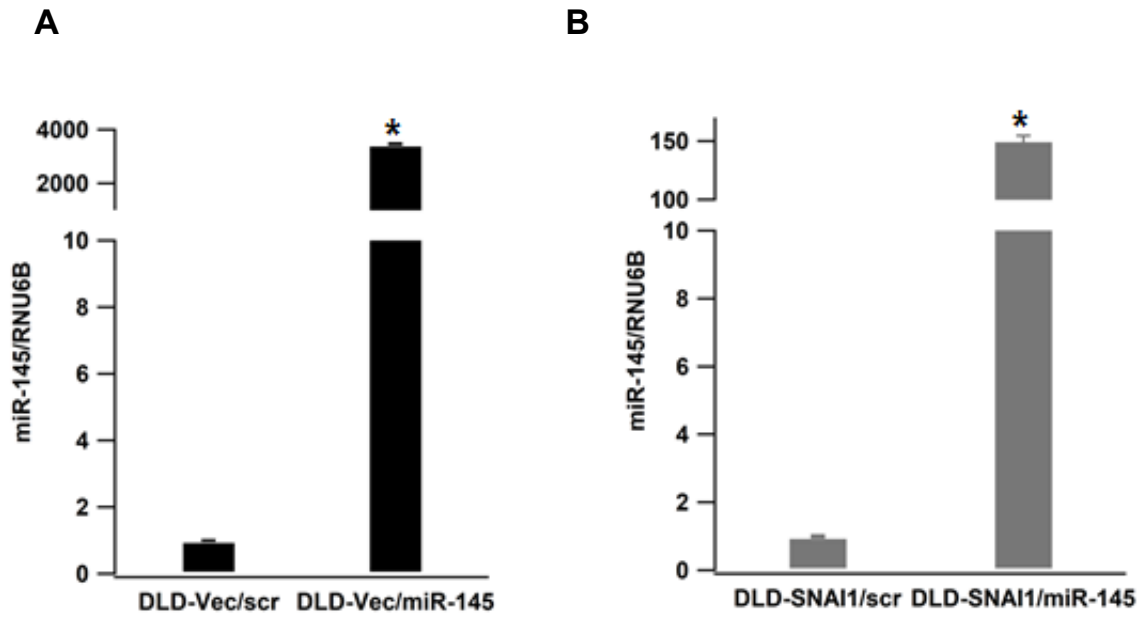

**Fig S3. miR-145 expression.** After miR-145 transfection for 48 hours in DLD1-Vec (A) and DLD1-SNAI1 (B) cells, miR-145 expression was quantitated by real time PCR (\*  $p < 0.05$ ).

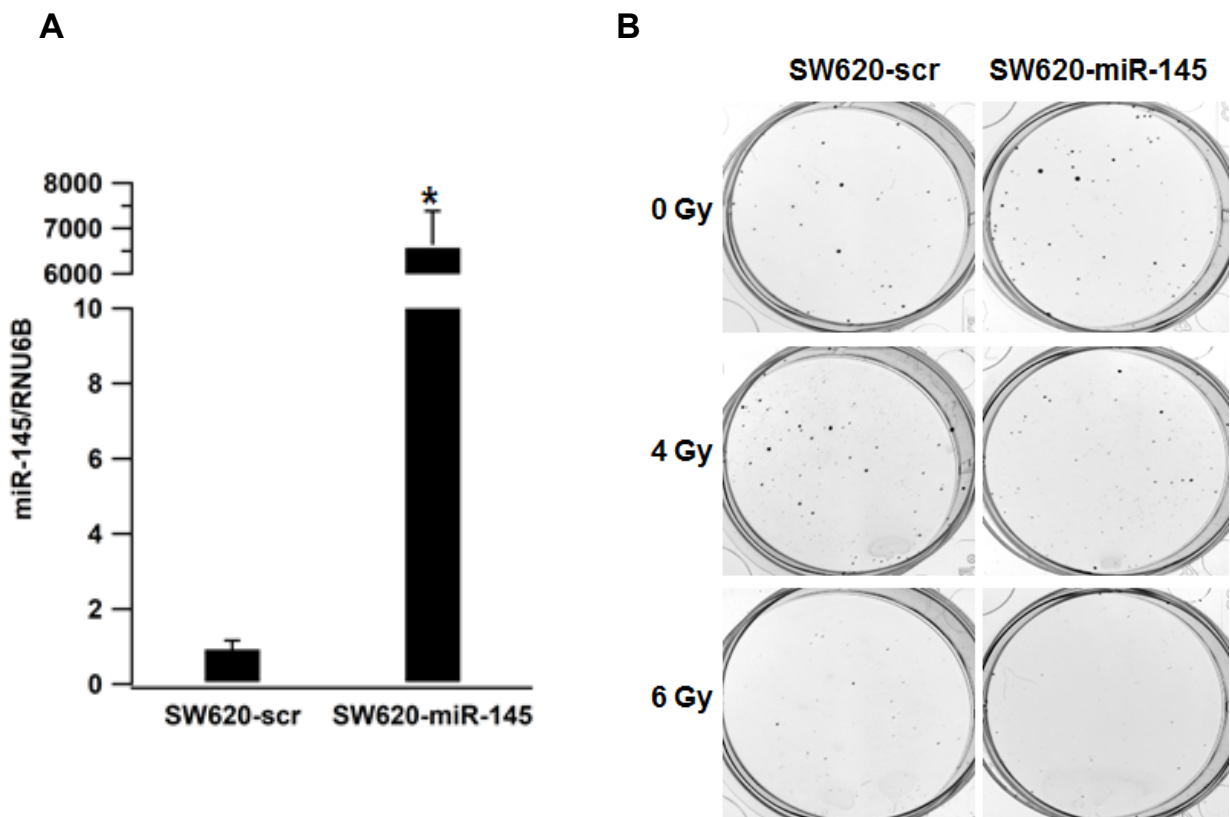

**Fig S4. miR-145 expression.** SW620 cell was transfected with miR-145 and scr vector for 48 hours, miR-145 expression was quantitated by real time PCR (A, \*  $p < 0.05$ ). B. Representative images of clonogenic assay on SW620 after miR-145 transfection and radiation therapy.

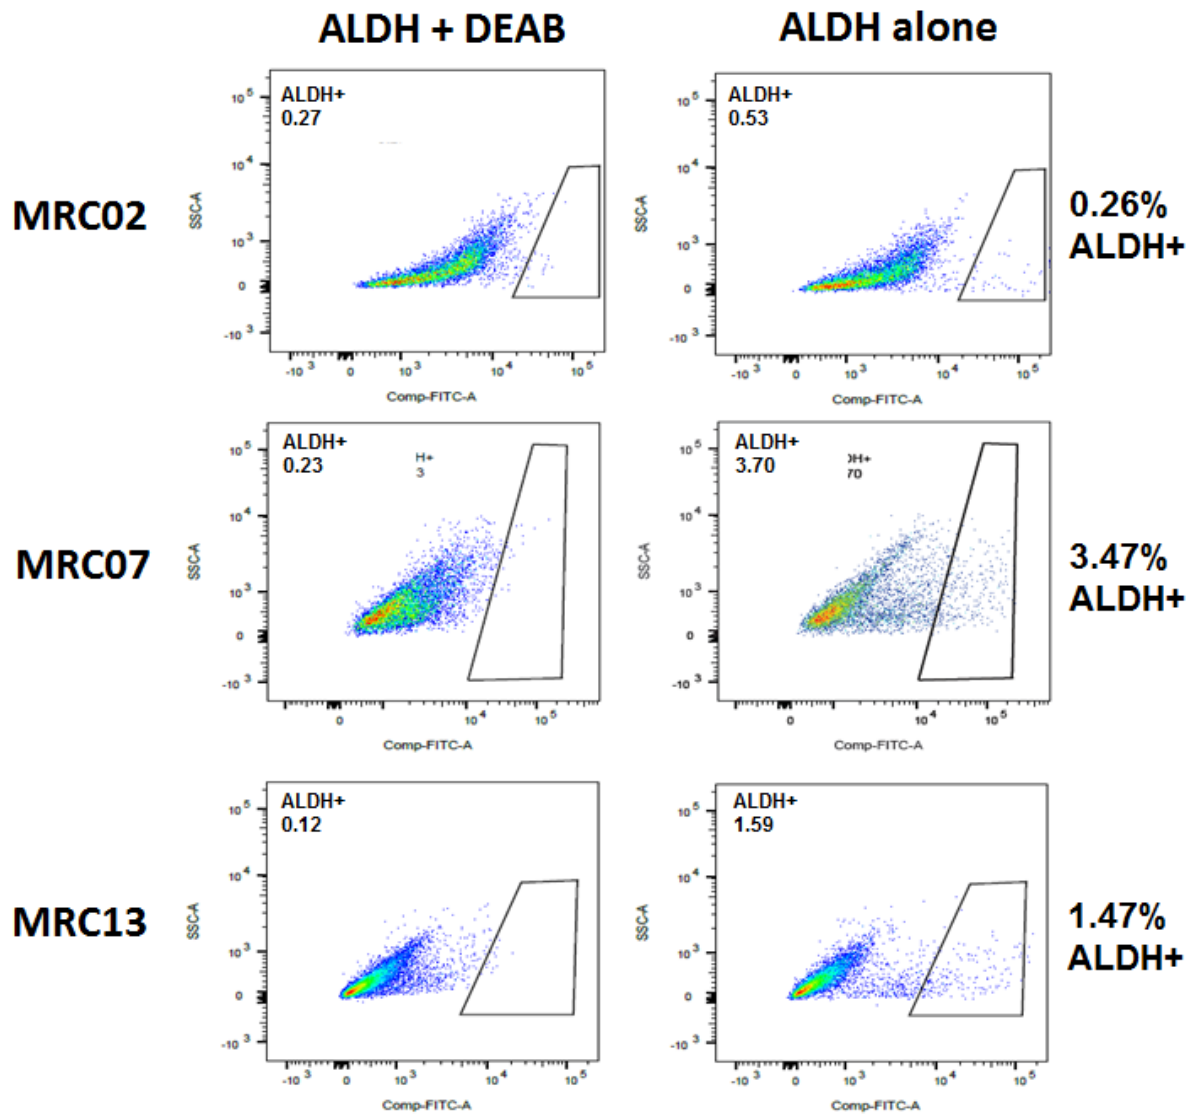

**Fig S5. Detection of EpCAM+/ALDH+ cancer stem cells in PDX tumors.** EpCAM+ and ALDH+ cells were detected by FACS comparing the fluorescence of test samples against that of control samples.

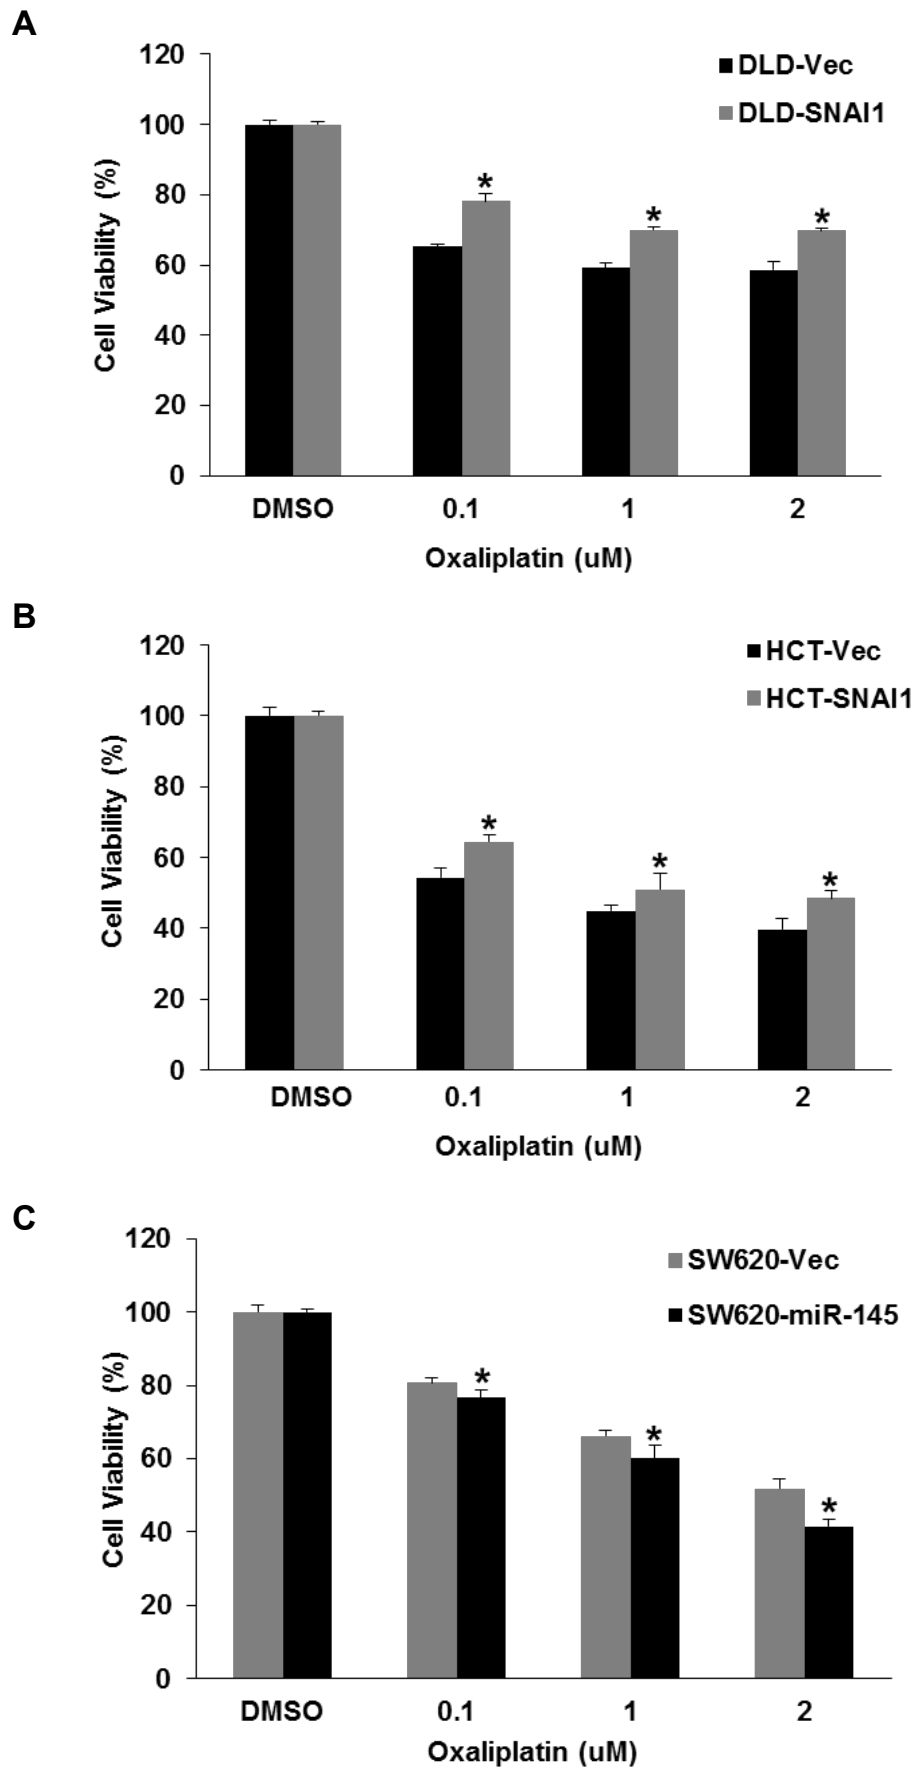

**Fig S6. SNAI1 confers Oxaliplatin resistance in CRC cell lines.** Cell viability assay on DLD1-SNAI1 (A) and HCT116-SNAI1 (B) cells with Oxaliplatin treatment comparing to the vector control cells (\*  $p < 0.05$ ). C. Cell viability assay on SW620 cell with Oxaliplatin therapy after miR-145 transfection comparing to scr control for 48 hours (\*  $p < 0.05$ ).
